# Supplementary material for: Machine learning in medical education: a survey of the experiences and opinions of medical students in Ireland
Source: HighWire-hosted journal article supplement (doi:10.1136/bmjhci-2021-100480), 2022-02-01
Supplement: bmjhci-2021-100480supp001_data_supplement.pdf [file bmjhci-2021-100480supp001_data_supplement.pdf]

## **MACHINE LEARNING AND MEDICINE: OPINIONS OF STUDENTS IN IRISH MEDICAL SCHOOLS**

### **Information Sheet and Consent Form**

Thank you for considering participating in this research project. The purpose of this document is to explain to you what the work is about and what your participation would involve, so as to enable you to make an informed choice.

The purpose of this study is to investigate the opinions of final year medical students in Ireland about technology and the future of medicine. We do not expect any knowledge of technologies: instead we are interested in your views as students'. Should you choose to participate, you will be asked some non-identifying demographic information, followed by questions with multiple choice answers asking you to express your level of agreement with various statements about how medicine might be impacted by technology. We are also interested in any comments you might have, should you feel able to provide them. The survey will take around 10-15 minutes to complete.

Your responses will help us to better understand the opinions of future medical professions on artificial intelligence, which in turn may help to inform medical curricula. While there are no direct benefits to you, participating in this survey may help to stimulate you to think about the role of technology in healthcare.

Participation in this study is completely voluntary. There is no obligation to participate, and should you choose to do so you can refuse to answer specific questions, or decide to withdraw from the study. We will not collect any personal or sensitive information therefore the survey will be fully anonymous. The survey is not a test, and your decision to participate will not affect your grades. Ticking the box below will indicate consent to participate.

You maintain the right to withdraw from the study at any stage up to the point of data submission. At this point your data will be collated with that of other participants and can no longer be retracted.

The anonymous data will be stored securely for up to ten years on the NUIG Server in secured form. The information you provide may contribute to research publications and/or conference presentations which may be publicly available. However, your contributions will be fully anonymous.

We do not anticipate any negative outcomes from participating in this study.

This study has obtained ethical approval from the Research Ethics Committee at NUIG.

If you have any queries about this research, you can contact Dr Muiris Houston at [muiris.houston@gmail.com](mailto:muiris.houston@gmail.com)

If you agree to take part in this study, please complete the consent question below.

### Consent Form

Do you consent to participate in this study?

Yes ☐

No ☐

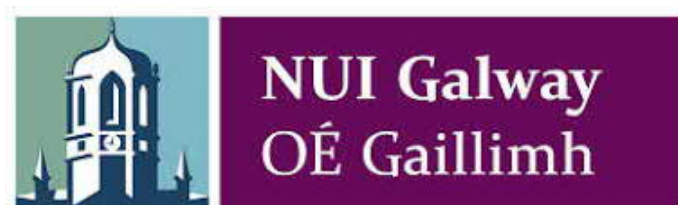

## MACHINE LEARNING AND MEDICINE:

### OPINIONS OF STUDENTS IN IRISH MEDICAL SCHOOLS

Dear Student,

**Researchers at the School of Medicine, NUIG invite you to take part in a survey. We are inviting you, as medical students to give your opinions about technology and the future of medicine. This research will help to inform medical educationalists and policy-makers.**

The survey should take around 10 (and no more than 15) minutes to complete. We will not collect any identifying information from you, and your responses will be fully anonymous. Your response will be collated with those of other respondents in aggregated, anonymous form. ***This survey is not a test; we are interested in your opinions as medical students.*** We refer you to the Information and Consent Sheet for more information.

If you decide to participate, we appreciate your time and contribution to our research.

Thank you.

Dr Muiris Houston, NUIG

Email contact: [muiris.houston@gmail.com](mailto:muiris.houston@gmail.com)

**SECTION A**

**In this section we will ask demographic questions.**

**A1. Gender. Please select box.**

- Male ☐ <sub>1</sub>
- Female ☐ <sub>2</sub>
- Not listed above (please specify) ☐ <sub>3</sub>
- Prefer not to answer ☐ <sub>4</sub>

**A2. Year of birth. Please enter year.**

**A3. Current year of your medical school education. Please select box.**

- 1<sup>st</sup> ☐ <sub>1</sub>
- 2<sup>nd</sup> ☐ <sub>2</sub>
- 3<sup>rd</sup> ☐ <sub>3</sub>
- 4<sup>th</sup> ☐ <sub>4</sub>
- 5<sup>th</sup> ☐ <sub>5</sub>

**A4. (i) Are you a graduate-entry student ('GEM')? Please select box.**

- No ☐ <sub>1</sub>
- Yes ☐ <sub>2</sub>

**(i) If you answered 'Yes' what was your undergraduate degree subject(s)? Please enter.**

**A5. What general area of medical specialty do you plan to enter? Please select one box only.**

|                                       |                          |    |                      |
|---------------------------------------|--------------------------|----|----------------------|
| General practice                      | <input type="checkbox"/> | 1  |                      |
| Internal medicine (any sub-specialty) | <input type="checkbox"/> | 2  |                      |
| Paediatrics                           | <input type="checkbox"/> | 3  |                      |
| Elderly care/ Geriatrics              | <input type="checkbox"/> | 4  |                      |
| General Surgery                       | <input type="checkbox"/> | 5  |                      |
| Other surgery specialty               | <input type="checkbox"/> | 6  |                      |
| Anesthetics                           | <input type="checkbox"/> | 7  |                      |
| Radiology                             | <input type="checkbox"/> | 8  |                      |
| Pathology (any sub-specialty)         | <input type="checkbox"/> | 9  |                      |
| Other (please specify)                | <input type="checkbox"/> | 10 | <input type="text"/> |

**A6. \*\*[OPTIONAL] Please enter your nationality.**

**A7. \*\*[OPTIONAL] What is your race/ethnicity? Please select.**

|                        |                          |   |                      |
|------------------------|--------------------------|---|----------------------|
| Asian                  | <input type="checkbox"/> | 1 |                      |
| Black                  | <input type="checkbox"/> | 2 |                      |
| White                  | <input type="checkbox"/> | 3 |                      |
| Mixed                  | <input type="checkbox"/> | 4 |                      |
| Other - Please specify | <input type="checkbox"/> | 5 | <input type="text"/> |

## **SECTION B**

**The questions in this section are on your opinions about the impact of machine learning/artificial intelligence on the future of primary care.**

**We do not assume you have any knowledge about machine learning or artificial intelligence in medicine.**

**Some people believe that machine learning/artificial intelligence will lead to significant changes in medical practice and that machines will one day replace the work of physicians; others deny that new technologies will ever have the capacity to replace this work.**

**While there is much debate about the impact of machine learning/artificial intelligence on medicine, we are interested in your opinions.**

**In this section we invite you to give your views about whether future technology will be able to perform various medical tasks as well as or better than the average GP.**

**In the questions below, we are interested in whether you believe technology will be able to FULLY REPLACE – NOT MERELY AID – GPs in performing these tasks.**

**The questions begin on the next page.**

**B1. In your opinion, what is the likelihood that future technology will be able to fully replace human doctors to perform the following task as well as or better than the average GP...**

**B1(i) Analyse patient information to reach diagnoses.**

|               |                      |   |   |                           |
|---------------|----------------------|---|---|---------------------------|
| Very unlikely | <input type="text"/> | 1 | } | Go to <b>B2</b>           |
| Unlikely      | <input type="text"/> | 2 |   |                           |
| Likely        | <input type="text"/> | 3 | } | First go to <b>B1(ii)</b> |
| Very likely   | <input type="text"/> | 4 |   |                           |

**B1(ii) If you answered Likely or Very likely:**

**When, in your estimation, will future technology have the capacity to fully replace the average GP in performing this task?**

|                             |                      |   |
|-----------------------------|----------------------|---|
| 0-4 years from now          | <input type="text"/> | 1 |
| 5 to 10 years from now      | <input type="text"/> | 2 |
| 11 to 25 years from now     | <input type="text"/> | 3 |
| 26-50 years from now        | <input type="text"/> | 4 |
| More than 50 years from now | <input type="text"/> | 5 |

**B2.** In your opinion, what is the likelihood that future technology will be able to fully replace human doctors to perform the following task as well as or better than the average GP...

**B2(i)** Analyse patient information to predict the likely course of the patient's illness.

Very unlikely

<sub>1</sub>

Unlikely

<sub>2</sub>

Likely

<sub>3</sub>

Very likely

<sub>4</sub>

Go to **B3**

First go to **B2(ii)**

**B2(ii)** If you answered *Somewhat likely, Likely or Very likely*:

When, in your estimation, will future technology have the capacity to fully replace the average GP in performing this task?

0-4 years from now

<sub>1</sub>

5 to 10 years from now

<sub>2</sub>

11 to 25 years from now

<sub>3</sub>

26-50 years from now

<sub>4</sub>

More than 50 years from now

<sub>5</sub>

**B3.** In your opinion, what is the likelihood that future technology will be able to fully replace human doctors to perform the following task as well as or better than the average GP...

**B3(i)** Evaluate when to refer patients to other health professionals.

Very unlikely

<sub>1</sub>

Unlikely

<sub>2</sub>

Likely

<sub>3</sub>

Very likely

<sub>4</sub>

Go to **B4**

First go to **B3(ii)**

**B3(ii)** *If you answered Somewhat likely, Likely or Very likely:*

When, in your estimation, will future technology have the capacity to replace the average GP in performing this task?

0-4 years from now

<sub>1</sub>

5 to 10 years from now

<sub>2</sub>

11 to 25 years from now

<sub>3</sub>

26-50 years from now

<sub>4</sub>

More than 50 years from now

<sub>5</sub>

**B4. In your opinion, what is the likelihood that future technology will be able to fully replace human doctors to perform the following task as well as or better than the average GP...**

**B4(i) Formulate personalised treatment plans for patients.**

|               |                                       |   |                           |
|---------------|---------------------------------------|---|---------------------------|
| Very unlikely | <input type="checkbox"/> <sub>1</sub> | } | Go to <b>B5</b>           |
| Unlikely      | <input type="checkbox"/> <sub>2</sub> |   |                           |
| Likely        | <input type="checkbox"/> <sub>3</sub> | } | First go to <b>B4(ii)</b> |
| Very likely   | <input type="checkbox"/> <sub>4</sub> |   |                           |

**B4(ii) If you answered *Somewhat likely, Likely or Very likely*:**

**When, in your estimation, will future technology have the capacity to replace the average GP in performing this task?**

|                             |                                       |
|-----------------------------|---------------------------------------|
| 0-4 years from now          | <input type="checkbox"/> <sub>1</sub> |
| 5 to 10 years from now      | <input type="checkbox"/> <sub>2</sub> |
| 11 to 25 years from now     | <input type="checkbox"/> <sub>3</sub> |
| 26-50 years from now        | <input type="checkbox"/> <sub>4</sub> |
| More than 50 years from now | <input type="checkbox"/> <sub>5</sub> |

**B5** In your opinion, what is the likelihood that future technology will be able to fully replace human doctors to perform the following task as well as or better than the average GP...

(i) **Provide empathetic care to patients.**

|               |                      |   |   |                           |
|---------------|----------------------|---|---|---------------------------|
| Very unlikely | <input type="text"/> | 1 | } | Go to <b>B6</b>           |
| Unlikely      | <input type="text"/> | 2 |   |                           |
| Likely        | <input type="text"/> | 3 | } | First go to <b>B5(ii)</b> |
| Very likely   | <input type="text"/> | 4 |   |                           |

**B5(ii)** *If answered Somewhat likely, Likely or Very likely:*

**When, in your estimation, will future technology have the capacity to fully replace the average GP in performing this task?**

|                             |                      |   |
|-----------------------------|----------------------|---|
| 0-4 years from now          | <input type="text"/> | 1 |
| 5 to 10 years from now      | <input type="text"/> | 2 |
| 11 to 25 years from now     | <input type="text"/> | 3 |
| 26-50 years from now        | <input type="text"/> | 4 |
| More than 50 years from now | <input type="text"/> | 5 |

**B6. In your opinion, what is the likelihood that future technology will be able to fully replace human doctors to perform the following task as well as or better than the average GP...**

**(i) Provide documentation (e.g., update medical records) about patients.**

|               |                      |   |   |                           |
|---------------|----------------------|---|---|---------------------------|
| Very unlikely | <input type="text"/> | 1 | } | Go to <b>B7</b>           |
| Unlikely      | <input type="text"/> | 2 |   |                           |
| Likely        | <input type="text"/> | 3 | } | First go to <b>B6(ii)</b> |
| Very likely   | <input type="text"/> | 4 |   |                           |

**B6(ii) If answered *Somewhat likely, Likely or Very likely*:**

**When, in your estimation, will future technology have the capacity to fully replace the average GP in performing this task?**

|                             |                      |   |
|-----------------------------|----------------------|---|
| 0-4 years from now          | <input type="text"/> | 1 |
| 5 to 10 years from now      | <input type="text"/> | 2 |
| 11 to 25 years from now     | <input type="text"/> | 3 |
| 26-50 years from now        | <input type="text"/> | 4 |
| More than 50 years from now | <input type="text"/> | 5 |

**B7. In 25 years, of the following options, in your opinion what is the likely impact of artificial intelligence/machine learning on the work of GPs.**

No influence (GPs' jobs will remain unchanged)

☐

1

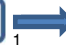

Go to **Section C**

Minimal influence (GPs' jobs will change slightly)

☐

2

Moderate influence (GPs' jobs will change substantially)

☐

3

Extreme influence (GPs' jobs become obsolete)

☐

4

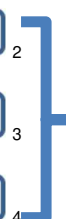

First go to **B8**

**B8. Please briefly describe the way(s) you believe artificial intelligence/machine learning will change GPs' jobs in the next 25 years.**

**Thank you for completing Section B.**

**Please turn over for Section C.**

**SECTION C**

**In this section we ask you to provide your level of agreement/disagreement with different statements.**

**C1. 25 years from now, technology (e.g., smartphone apps) will be used to decide when patients need to see a GP.**

|                     |                          |   |
|---------------------|--------------------------|---|
| Strongly disagree   | <input type="checkbox"/> | 1 |
| Moderately disagree | <input type="checkbox"/> | 2 |
| Somewhat disagree   | <input type="checkbox"/> | 3 |
| Somewhat agree      | <input type="checkbox"/> | 4 |
| Moderately agree    | <input type="checkbox"/> | 5 |
| Strongly agree      | <input type="checkbox"/> | 6 |

**C2. 25 years from now, GPs will routinely work in partnership with artificial intelligence/machine learning to diagnose patients.**

|                     |                          |   |
|---------------------|--------------------------|---|
| Strongly disagree   | <input type="checkbox"/> | 1 |
| Moderately disagree | <input type="checkbox"/> | 2 |
| Somewhat disagree   | <input type="checkbox"/> | 3 |
| Somewhat agree      | <input type="checkbox"/> | 4 |
| Moderately agree    | <input type="checkbox"/> | 5 |
| Strongly agree      | <input type="checkbox"/> | 6 |

**C3. 25 years from now, GPs will routinely work in partnership with artificial intelligence/machine learning to determine the likely course of a patient's illness.**

|                     |                          |   |
|---------------------|--------------------------|---|
| Strongly disagree   | <input type="checkbox"/> | 1 |
| Moderately disagree | <input type="checkbox"/> | 2 |
| Somewhat disagree   | <input type="checkbox"/> | 3 |
| Somewhat agree      | <input type="checkbox"/> | 4 |
| Moderately agree    | <input type="checkbox"/> | 5 |
| Strongly agree      | <input type="checkbox"/> | 6 |

**C4. 25 years from now, GPs will routinely work in partnership with artificial intelligence/machine learning to devise patient treatment plans.**

|                     |                          |   |
|---------------------|--------------------------|---|
| Strongly disagree   | <input type="checkbox"/> | 1 |
| Moderately disagree | <input type="checkbox"/> | 2 |
| Somewhat disagree   | <input type="checkbox"/> | 3 |
| Somewhat agree      | <input type="checkbox"/> | 4 |
| Moderately agree    | <input type="checkbox"/> | 5 |
| Strongly agree      | <input type="checkbox"/> | 6 |

**C5. 25 years from now, remote monitoring of patients' vital signs will be more common than in-person check-ups of vital signs with GPs.**

|                     |                          |   |
|---------------------|--------------------------|---|
| Strongly disagree   | <input type="checkbox"/> | 1 |
| Moderately disagree | <input type="checkbox"/> | 2 |
| Somewhat disagree   | <input type="checkbox"/> | 3 |
| Somewhat agree      | <input type="checkbox"/> | 4 |
| Moderately agree    | <input type="checkbox"/> | 5 |
| Strongly agree      | <input type="checkbox"/> | 6 |

**C6. 25 years from now, patients' will have greater access to their own medical records than they do today.**

|                     |                          |   |
|---------------------|--------------------------|---|
| Strongly disagree   | <input type="checkbox"/> | 1 |
| Moderately disagree | <input type="checkbox"/> | 2 |
| Somewhat disagree   | <input type="checkbox"/> | 3 |
| Somewhat agree      | <input type="checkbox"/> | 4 |
| Moderately agree    | <input type="checkbox"/> | 5 |
| Strongly agree      | <input type="checkbox"/> | 6 |

**Thank you for completing Section C.**

**Please turn over for Section D.**

**SECTION D**

**This section asks you questions about the potential benefits and harms of artificial intelligence/machine learning in medical care. Again, we ask you to provide your level of agreement/disagreement with different statements.**

**D1. 25 years from now, the implementation of innovations in artificial intelligence/machine learning will reduce rates of diagnostic errors in medicine.**

|                     |                          |   |
|---------------------|--------------------------|---|
| Strongly disagree   | <input type="checkbox"/> | 1 |
| Moderately disagree | <input type="checkbox"/> | 2 |
| Somewhat disagree   | <input type="checkbox"/> | 3 |
| Somewhat agree      | <input type="checkbox"/> | 4 |
| Moderately agree    | <input type="checkbox"/> | 5 |
| Strongly agree      | <input type="checkbox"/> | 6 |

**D2. 25 years from now, the implementation of innovations in artificial intelligence/machine learning will increase patient access to medical care.**

|                     |                          |   |
|---------------------|--------------------------|---|
| Strongly disagree   | <input type="checkbox"/> | 1 |
| Moderately disagree | <input type="checkbox"/> | 2 |
| Somewhat disagree   | <input type="checkbox"/> | 3 |
| Somewhat agree      | <input type="checkbox"/> | 4 |
| Moderately agree    | <input type="checkbox"/> | 5 |
| Strongly agree      | <input type="checkbox"/> | 6 |

**D3. 25 years from now, the implementation of innovations in artificial intelligence/machine learning will reduce healthcare costs.**

|                     |                          |   |
|---------------------|--------------------------|---|
| Strongly disagree   | <input type="checkbox"/> | 1 |
| Moderately disagree | <input type="checkbox"/> | 2 |
| Somewhat disagree   | <input type="checkbox"/> | 3 |
| Somewhat agree      | <input type="checkbox"/> | 4 |
| Moderately agree    | <input type="checkbox"/> | 5 |
| Strongly agree      | <input type="checkbox"/> | 6 |

**D4. If offered the choice patients would prefer home monitoring of vital signs compared to visiting their GP.**

|                     |                          |   |
|---------------------|--------------------------|---|
| Strongly disagree   | <input type="checkbox"/> | 1 |
| Moderately disagree | <input type="checkbox"/> | 2 |
| Somewhat disagree   | <input type="checkbox"/> | 3 |
| Somewhat agree      | <input type="checkbox"/> | 4 |
| Moderately agree    | <input type="checkbox"/> | 5 |
| Strongly agree      | <input type="checkbox"/> | 6 |

**D5. Patients will always prefer receiving important medical information via face-to-face consultations with GPs rather than via their devices.**

Strongly disagree

☐

1

Moderately disagree

☐

2

Somewhat disagree

☐

3

Somewhat agree

☐

4

Moderately agree

☐

5

Strongly agree

☐

6

**D6. Please provide any brief comments you may have about the potential benefits of artificial intelligence/machine learning in medicine.**

**D7. Please provide any brief comments you may have about the potential harms of artificial intelligence/machine learning in medicine.**

## SECTION E

The questions in this section ask about your familiarity with artificial intelligence/machine learning.

**E1. Have you heard of machine learning?**

No  <sub>1</sub>

Yes  <sub>2</sub>

**E2. Are you familiar with big data analytics?**

No  <sub>1</sub>

Yes  <sub>2</sub>

**E3. Have you read any academic journal articles about artificial intelligence/machine learning in medicine?**

No  <sub>1</sub>

Yes  <sub>2</sub>

**E4. Please estimate how many hours your instructors/lecturers have spent discussing artificial intelligence/machine learning during your medical degree so far.**

**E5. Please estimate how many hours your instructors/lecturers will spend discussing artificial intelligence/machine learning during the course of obtaining your medical degree.**

**E6. Do you plan to learn about artificial intelligence/machine learning as they pertain to medicine?**

No  <sub>1</sub>

Yes  <sub>2</sub>

Maybe  <sub>3</sub>

**E7. Discussion about artificial intelligence/machine learning should be part of medical training.**

Strongly disagree  <sub>1</sub>

Moderately disagree  <sub>2</sub>

Somewhat disagree  <sub>3</sub>

Somewhat agree  <sub>4</sub>

Moderately agree  <sub>5</sub>

Strongly agree  <sub>6</sub>

**Thank you for completing Section E.**

**Please turn to the final question in Section F.**

**SECTION F**

The question in this section is about your perceptions of the GP workforce.

**F1. The number of primary care physicians worldwide is...**

Much less than the demand

☐

1

Somewhat less than the demand

☐

2

About equal to the demand

☐

3

Somewhat greater than the demand

☐

4

Much greater than the demand

☐

5

**THANK YOU FOR TAKING THE TIME TO COMPLETE THIS SURVEY!**  
**PLEASE RETURN YOUR COMPLETED SURVEY**
